# Supplementary material for: Relationships between Unilateral Muscle Strength Qualities and Change of Direction in Adolescent Team-Sport Athletes
Source: MDPI journal article supplement (doi:10.3390/sports6030083), 2018-08-20
Supplement: s1 [file s1]

# Relationships between Unilateral Muscle Strength Qualities and Change of Direction in Adolescent Team-Sport Athletes

**Table S1.** Correlation coefficients between muscle strength qualities and COD ability on the right limb.

| Variable   | CODS    |                      | COD Deficit |                      |
|------------|---------|----------------------|-------------|----------------------|
|            | 505 R   | 505 <sub>mod</sub> R | 505 R       | 505 <sub>mod</sub> R |
| Soccer     |         |                      |             |                      |
| CMJ-RSImod | -0.54*  | -0.66**              | -0.16       | -0.38                |
| CMJ height | -0.55*  | -0.68**              | -0.08       | -0.29                |
| SLH        | -0.70** | -0.77**              | -0.27       | -0.38                |
| IMTP-PF    | -0.14   | -0.18                | 0.09        | -0.03                |
| ECC-EXT    | -0.39   | -0.56*               | -0.21       | -0.38                |
| Cricket    |         |                      |             |                      |
| CMJ-RSImod | -0.53** | -0.53**              | -0.20       | -0.25                |
| CMJ height | -0.58** | -0.58**              | -0.20       | -0.26                |
| SLH        | -0.64** | -0.71**              | -0.32       | -0.43*               |
| IMTP-PF    | -0.66** | -0.70**              | -0.37*      | -0.50**              |
| ECC-EXT    | -0.39   | -0.47*               | -0.20       | -0.30                |
| Court      |         |                      |             |                      |
| CMJ-RSImod | -0.18   | -0.23                | -0.23       | -0.27                |
| CMJ height | -0.45*  | -0.49*               | -0.10       | -0.19                |
| SLH        | -0.60** | -0.47*               | -0.30       | -0.35                |
| IMTP-PF    | -0.26   | -0.20                | 0.08        | -0.16                |
| ECC-EXT    | -0.02   | -0.31                | -0.11       | 0.01                 |

Notes: CMJ = countermovement jump; RSImod = reactive strength index-modified; SLH = single-leg hop; IMTP-PF = isometric mid-thigh pull peak force; ECC-EXT = eccentric extensor; 505<sub>mod</sub> = modified 505; CODS = change of direction speed; COD deficit = change of direction deficit; L= left.\*Correlation significant at  $p \leq 0.05$ . \*\*Correlation significant at  $p \leq 0.001$ .

**Table S2.** Correlation coefficients between muscle strength qualities and COD measures on the left limb.

| Variable   | CODS    |                      | COD Deficit |                      |
|------------|---------|----------------------|-------------|----------------------|
|            | 505 L   | 505 <sub>mod</sub> L | 505 L       | 505 <sub>mod</sub> L |
| Soccer     |         |                      |             |                      |
| CMJ-RSImod | -0.71** | -0.65**              | -0.41       | -0.27                |
| CMJ height | -0.66** | -0.61**              | -0.38       | -0.27                |
| SLH        | -0.71** | -0.71**              | -0.22       | -0.26                |
| IMTP-PF    | 0.07    | 0.11                 | 0.11        | 0.14                 |
| ECC-EXT    | -0.32   | -0.42                | -0.05       | -0.25                |
| Cricket    |         |                      |             |                      |
| CMJ-RSImod | -0.58** | -0.55**              | -0.16       | -0.22                |
| CMJ height | -0.72** | -0.71**              | -0.23       | -0.28                |
| SLH        | -0.62** | -0.70**              | -0.15       | -0.43*               |
| IMTP-PF    | -0.71** | -0.66**              | -0.39*      | -0.37*               |

|                        |         |         |       |        |
|------------------------|---------|---------|-------|--------|
| ECC-EXT                | -0.56** | -0.50** | -0.22 | -0.26  |
| Court                  |         |         |       |        |
| CMJ-RSI <sub>mod</sub> | -0.27   | -0.45*  | -0.32 | -0.44* |
| CMJ height             | -0.68** | -0.64** | -0.34 | -0.38  |
| SLH                    | -0.47*  | -0.54** | -0.32 | -0.37  |
| IMTP-PF                | -0.47*  | -0.33   | -0.15 | -0.20  |
| ECC-EXT                | -0.35   | -0.36   | -0.01 | -0.05  |

Notes: CMJ = countermovement jump; RSI<sub>mod</sub> = reactive strength index-modified; SLH = single-leg hop; IMTP-PF = isometric mid-thigh pull peak force; ECC-EXT = eccentric extensor; 505<sub>mod</sub> = modified 505; CODS = change of direction speed; COD deficit = change of direction deficit; L= left. \*Correlation significant at  $p \leq 0.05$ . \*\*Correlation significant at  $p \leq 0.001$ .

**Table S3.** Correlation coefficients between muscle strength qualities and COD measures average across both limbs.

| Variable               | CODS    |                    | COD Deficit |                    |
|------------------------|---------|--------------------|-------------|--------------------|
|                        | 505     | 505 <sub>mod</sub> | 505         | 505 <sub>mod</sub> |
| Soccer                 |         |                    |             |                    |
| CMJ-RSI <sub>mod</sub> | -0.66** | -0.69**            | -0.31       | -0.35              |
| CMJ height             | -0.59** | -0.62**            | -0.31       | -0.32              |
| SLH                    | -0.73** | -0.76**            | -0.33       | -0.35              |
| IMTP-PF                | -0.02   | -0.03              | 0.16        | 0.15               |
| ECC-EXT                | -0.36   | -0.53*             | -0.13       | -0.41              |
| Cricket                |         |                    |             |                    |
| CMJ-RSI <sub>mod</sub> | -0.59** | -0.55**            | -0.27       | -0.29              |
| CMJ height             | -0.75** | -0.70**            | -0.32       | -0.33              |
| SLH                    | -0.67** | -0.73**            | -0.33       | -0.47*             |
| IMTP-PF                | -0.73** | -0.70**            | -0.42*      | -0.48*             |
| ECC-EXT                | -0.54** | -0.55**            | -0.20       | -0.26              |
| Court                  |         |                    |             |                    |
| CMJ-RSI <sub>mod</sub> | -0.28   | -0.35              | -0.27       | -0.36              |
| CMJ height             | -0.53*  | -0.59**            | -0.19       | -0.31              |
| SLH                    | -0.59** | -0.57**            | -0.32       | -0.40*             |
| IMTP-PF                | -0.40   | -0.30              | -0.04       | -0.22              |
| ECC-EXT                | -0.17   | -0.36              | 0.13        | -0.02              |

Notes: CMJ = countermovement jump; RSI<sub>mod</sub> = reactive strength index-modified; SLH = single-leg hop; IMTP-PF = isometric mid-thigh pull peak force; ECC-EXT = eccentric extensor; 505<sub>mod</sub> = modified 505; CODS = change of direction speed; COD deficit = change of direction deficit. \*Correlation significant at  $p \leq 0.05$ . \*\*Correlation significant at  $p \leq 0.001$ .
